# Supplementary material
Source: publisher site journal article supplement (https://www.dovepress.com/article/369763)
Supplement: Supplementary file 1 [file get_supplementary_file.php]

# Supplemental material for: Does a code for acute myocardial infarction mean the same in all Norwegian hospitals? A likelihood approach to a medical record review

Jon Helgeland, Doris Tove Kristoffersen and Katrine Damgaard Skyrud  
*Norwegian Institute of Public Health, Oslo, Norway*

Table S1. cTn calibration parameters

| Assay          | Intercept | Slope | Scale | Source                            |
|----------------|-----------|-------|-------|-----------------------------------|
| Architect Tnl  | 0.390     | 0.625 | log10 | Wildi (2015)                      |
| Advia Tnl      | 0.743     | 0.500 | log10 | Wildi (2015)                      |
| Roche 4gen TnT | 19.200    | 0.991 | lin   | Saenger (2011), Giannitsis (2010) |
| Roche hs-TnT   | 0.000     | 1.000 | lin   | Reference                         |

Table S2. Estimated parameters of published log-cTn distributions in non-AMI populations

| Patient population                    | cTn type | Mean  | Std.dev. | Source           |
|---------------------------------------|----------|-------|----------|------------------|
| Congestive heart failure              | hsTnT    | 2.335 | 1.042    | Latini (2007)    |
| Final diagnosis other than AMI        | hsTnT    | 2.864 | 1.328    | Ostermann (2014) |
| Chronic obstructive pulmonary disease | hsTnl    | 1.015 | 0.466    | Adamson (2018)   |
| Inpatients                            | hsTnl    | 1.311 | 0.748    | Mariathas (2019) |
| Non-AMI reference                     |          | 1.613 | 1.557    | Present study    |

Troponin measurements are expressed in units of  $\mu\text{g/L}$

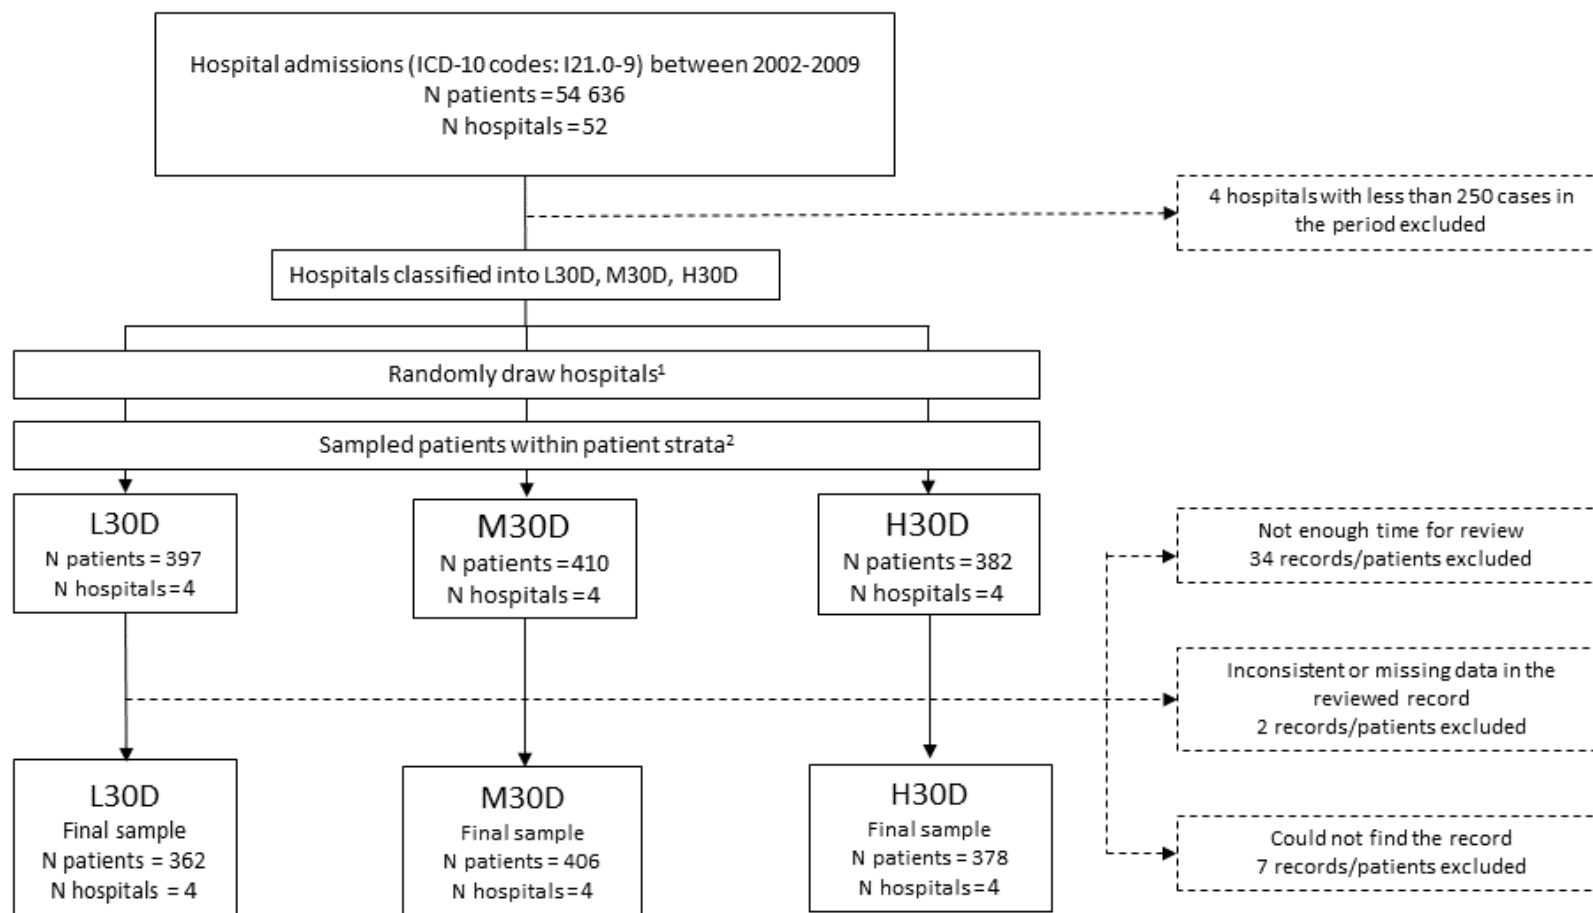

<sup>1</sup>Drawn randomly, constrained by requiring balance between hospital regions and hospital types (local or intermediate sized hospitals or regional referral hospitals)

<sup>2</sup>Patient strata: (i) Survived 30 days after admission, with length of stay not exceeding the median; (ii) Survived 30 days after admission, with length of stay greater than the median; (iii) Died within 30 days

Figure S1. Overview of sampling and dataset

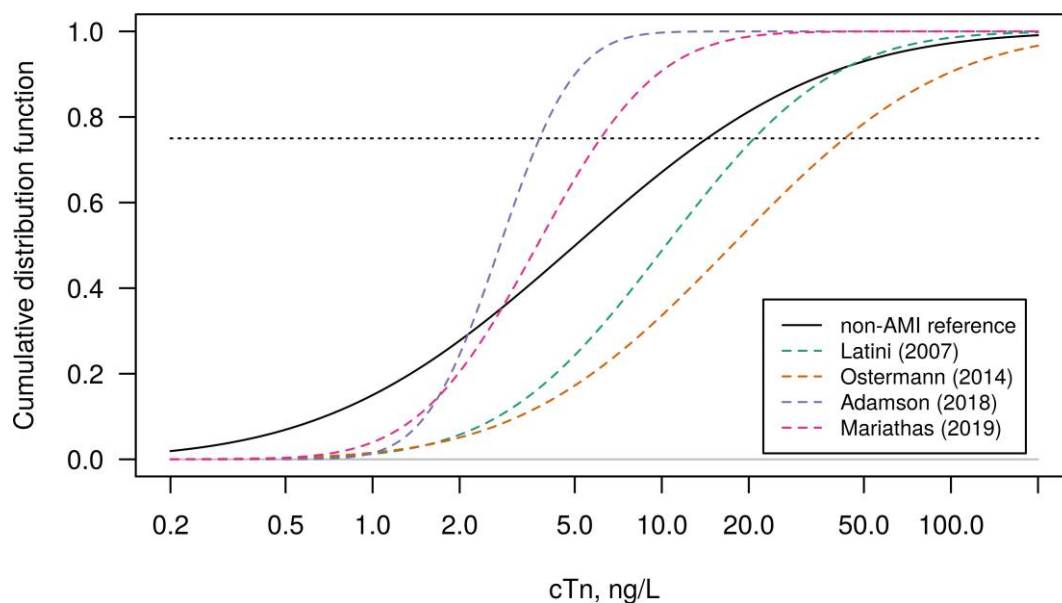

Figure S2. Estimated cTn distributions for non-AMI populations

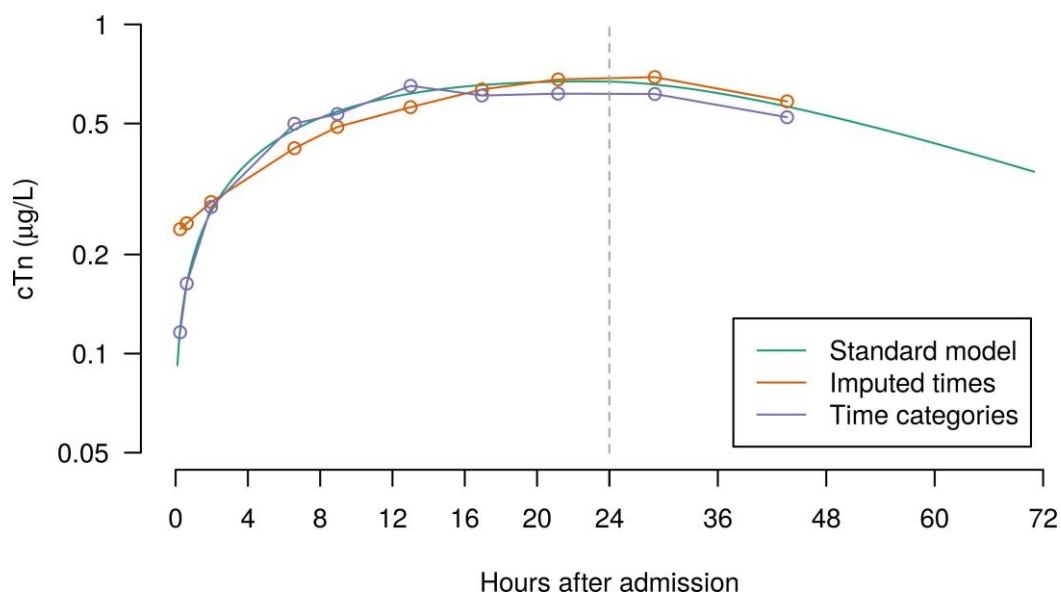

Figure S3. Fitted mean cTn vs time for the AMI population. Standard model as well as models with time from symptom onset, shown as medians over time intervals (notice break of time scale)

## References

- [1] P. D. Adamson, J. A. Anderson, R. D. Brook, P. M. A. Calverley, B. R. Celli, N. J. Cowans, C. Crim, I. J. Dixon, F. J. Martinez, D. E. Newby, J. Vestbo, J. C. Yates, and N. L. Mills. Cardiac troponin I and cardiovascular risk in patients with chronic obstructive pulmonary disease. *J Am Coll Cardiol*, 72(10):1126–1137, 2018.
- [2] E. Giannitsis, K. Kurz, K. Hallermayer, J. Jarausch, A. S. Jaffe, and H. A. Katus. Analytical validation of a high-sensitivity cardiac troponin T assay. *Clin Chem*, 56(2):254–61, 2010.
- [3] R. Latini, S. Masson, I. S. Anand, E. Missov, M. Carlson, T. Vago, L. Angelici, S. Barlera, G. Parrinello, A. P. Maggioni, G. Tognoni, J. N. Cohn, and F. T. Val-He. Prognostic value of very low plasma concentrations of troponin T in patients with stable chronic heart failure. *Circulation*, 116(11):1242–9, 2007.
- [4] M. Mariathas, R. Allan, S. Ramamoorthy, B. Olechowski, J. Hinton, M. Azor, Z. Nicholas, A. Calver, S. Corbett, M. Mahmoudi, J. Rawlins, I. Simpson, J. Wilkinson, C. S. Kwok, P. Cook, M. A. Mamas, and N. Curzen. True 99th centile of high sensitivity cardiac troponin for hospital patients: prospective, observational cohort study. *BMJ*, 364:l729, 2019.
- [5] M. Ostermann, J. Lo, M. Toolan, E. Tuddenham, B. Sanderson, K. Lei, J. Smith, A. Griffiths, I. Webb, J. Coutts, J. Chambers, P. Collinson, J. Peacock, D. Bennett, and D. Treacher. A prospective study of the impact of serial troponin measurements on the diagnosis of myocardial infarction and hospital and six-month mortality in patients admitted to ICU with non-cardiac diagnoses. *Crit Care*, 18(2):R62, 2014.
- [6] A. K. Saenger, R. Beyrau, S. Braun, R. Cooray, A. Dolci, H. Freidank, E. Giannitsis, S. Gustafson, B. Handy, H. Katus, S. E. Melanson, M. Panteghini, P. Venge, M. Zorn, P. Jarolim, D. Bruton, J. Jarausch, and A. S. Jaffe. Multicenter analytical evaluation of a high-sensitivity troponin T assay. *Clinica Chimica Acta*, 412(9):748–754, 2011.
- [7] K. Wildi, M. R. Gimenez, R. Twerenbold, T. Reichlin, C. Jaeger, A. Heinzelmann, C. Arnold, B. Nelles, S. Druey, P. Haaf, P. Hillinger, N. Schaerli, P. Kreuzinger, Y. Tanglay, T. Herrmann, Z. Moreno Weidmann, L. Krivoshei, M. Freese, C. Stelzig, C. Puelacher, K. Rentsch, S. Osswald, and C. Mueller. Misdiagnosis of myocardial infarction related to limitations of the current regulatory approach to define clinical decision values for cardiac troponin. *Circulation*, 131(23):2032–40, 2015.
